# Supplementary material for: Changes in Prevalence and Health Checkup Coverage Rate of Chronic Kidney Disease (CKD) after Introduction of Prefecture-Wide CKD Initiative: Results of the Kagawa Association of CKD Initiatives
Source: MDPI journal article supplement (doi:10.3390/jpm11111121), 2021-10-30
Supplement: s1 [file s1]

# Changes in Prevalence and Health Checkup Coverage Rate of Chronic Kidney Disease (CKD) after Introduction of Prefecture-Wide CKD Initiative: Results of the Kagawa Association of CKD Initiatives

Tadashi Sofue <sup>1,\*</sup>, Taiga Hara <sup>2</sup>, Yoko Nishijima <sup>3</sup>, Satoshi Nishioka <sup>4</sup>, Hiroyuki Watatani <sup>5</sup>, Masahito Yamanaka <sup>6</sup>, Norihiro Takahashi <sup>7</sup>, Akira Nishiyama <sup>8</sup>, Tetsuo Minamino <sup>1</sup> and Kagawa Association of Chronic Kidney Disease Initiatives

<sup>1</sup> Department of Cardioresenal and Cerebrovascular Medicine, Kagawa University, Takamatsu 761-0793, Kagawa, Japan; minamino.tetsuo.gk@kagawa-u.ac.jp

<sup>2</sup> Department of Medicine for Community Healthcare Revitalization, Kagawa University, Takamatsu 761-0793, Kagawa, Japan; hara.taiga@kagawa-u.ac.jp

<sup>3</sup> Department of CardioRenal Disease Regional Medicine, Kagawa University, Takamatsu 761-0793, Kagawa, Japan; nishijima.yoko@kagawa-u.ac.jp

<sup>4</sup> Department of Nephrology, Takamatsu Red Cross Hospital, Takamatsu 760-0017, Kagawa, Japan; nsatoshi2400@yahoo.co.jp

<sup>5</sup> Department of Nephrology and Rheumatology, Kagawa Prefectural Central Hospital, Takamatsu 760-8557, Kagawa, Japan; watatani@pa3.so-net.ne.jp

<sup>6</sup> Department of Urology, Takamatsu Red Cross Hospital, Takamatsu 760-0017, Kagawa, Japan; ymasahito21@gmail.com

<sup>7</sup> Department of Internal medicine, Shido-Akiyama Clinic, Takamatsu 769-2101, Kagawa, Japan; ntaka3658@yahoo.co.jp

<sup>8</sup> Department of Pharmacology, Kagawa University, Takamatsu 761-0793, Kagawa, Japan; nishiyama.akira@kagawa-u.ac.jp

\* Correspondence: sofue.tadashi@kagawa-u.ac.jp; Tel.: +81-(87)-891-2150; Fax: +81-(87)-891-2152

† Membership of the Kagawa Association of Chronic Kidney Disease Initiatives is provided in the Acknowledgments.

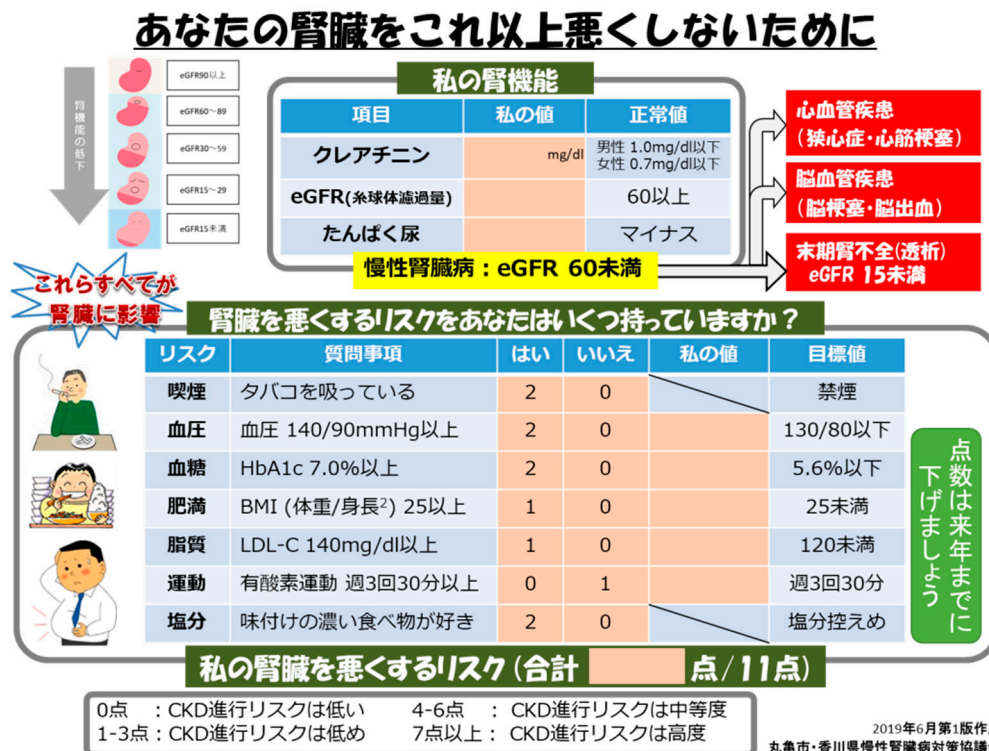

**Figure S1.** Risk factor list chart for CKD used by the participatory structured group education program (In Japanese).

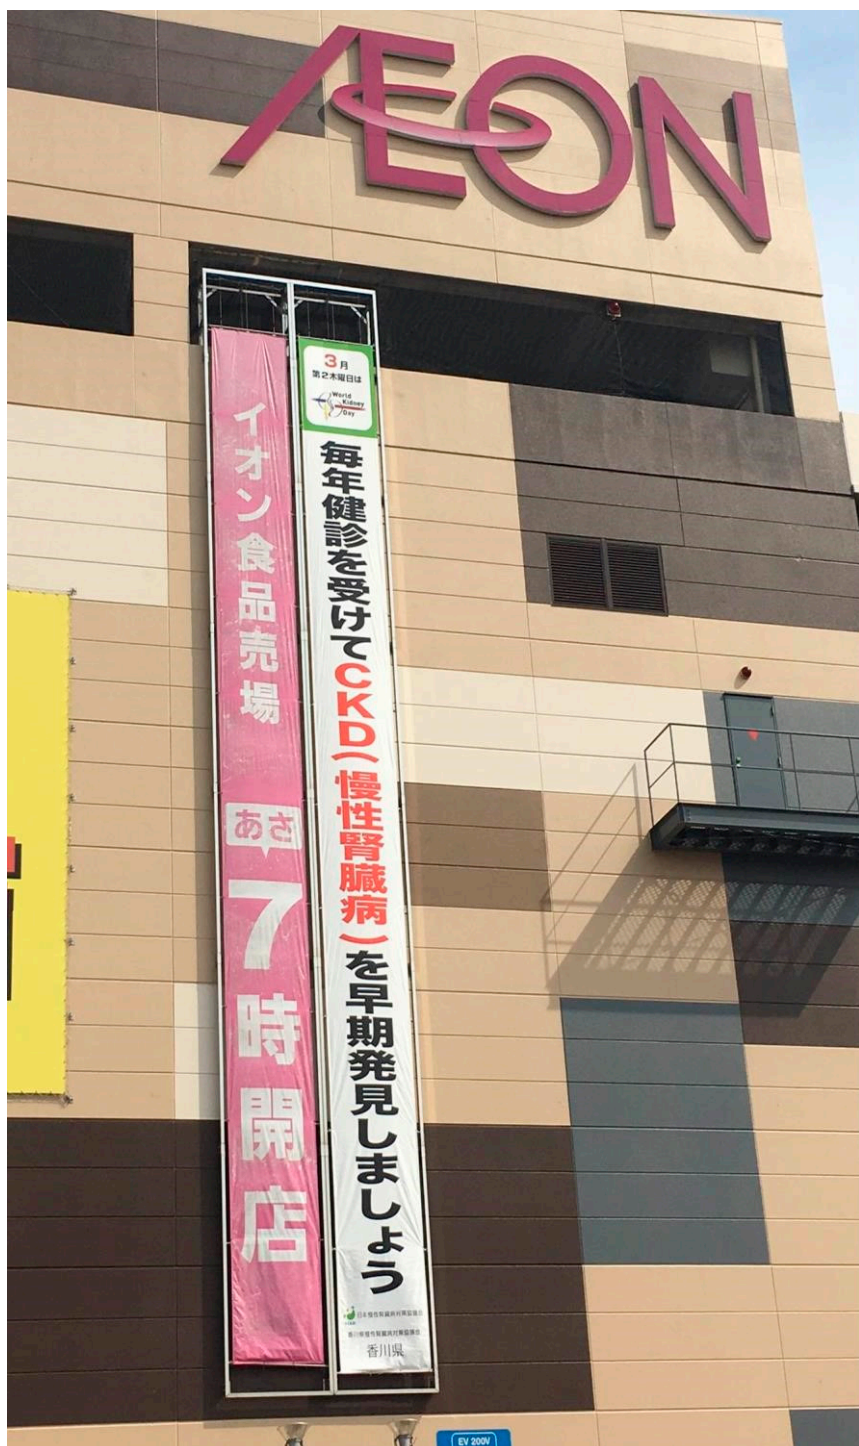

**Figure S2.** The hanging banners to inform the public that we provide CKD checkups as part of the NHI health checkups (In Japanese).

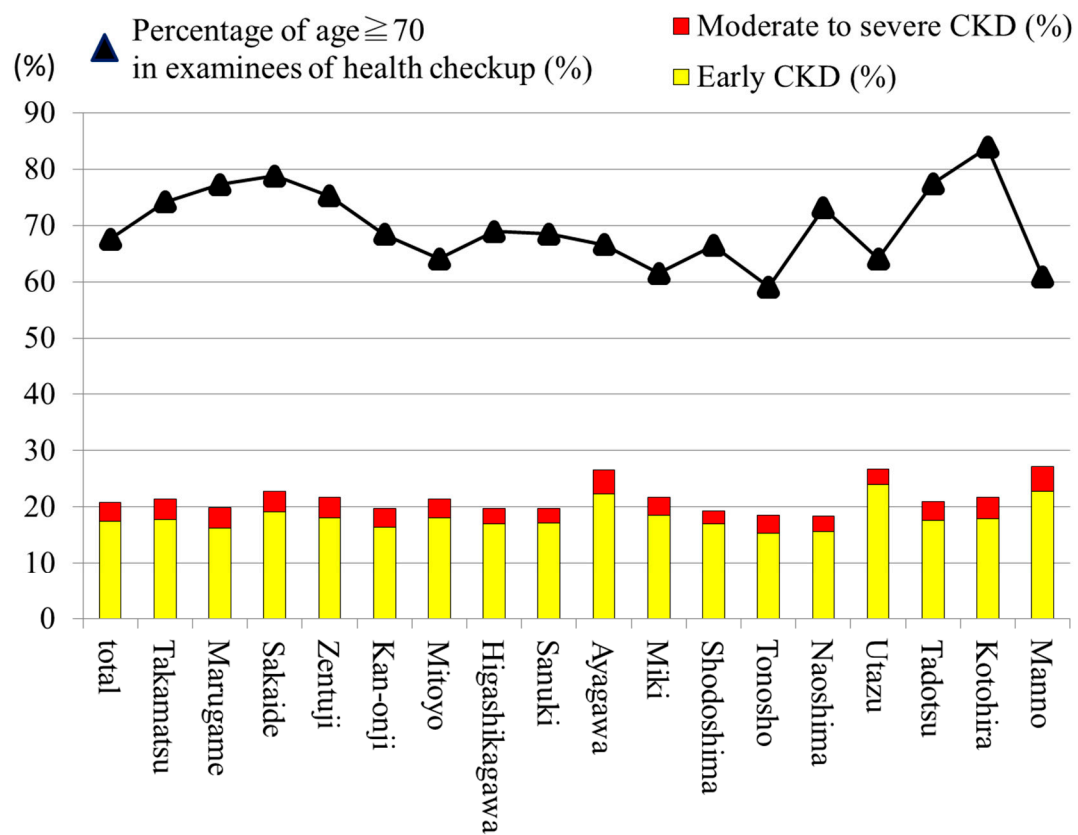

**Figure S3.** The prevalence of CKD among the 17 cities and towns in 2017.
